# Supplementary material for: Spo0A∼P Imposes a Temporal Gate for the Bimodal Expression of Competence in Bacillus subtilis
Source: PLOS journal article supplement (doi:10.1371/journal.pgen.1002586), 2012-03-08
Supplement: S10 (10.1371/journal.pgen.1002586.s010) [file journal.pgen.1002586.s010]

Spo0A~P imposes a temporal gate for the bimodal expression of competence in *B. subtilis*  
Table S3 Rate Coefficients

| Rate Parameter | Value                                                  | Description                                                                        |
|----------------|--------------------------------------------------------|------------------------------------------------------------------------------------|
| $\mu_{GF1}$    | $2 \text{ molecules}^{-1}\text{hours}^{-1}$            | Production rate of GF from 0 to 2.5 hours                                          |
| $\mu_{GF2}$    | $0 \text{ molecules}^{-1}\text{hours}^{-1}$            | Production rate of GF from 2.5 to 3 hours                                          |
| $\mu_{GF3}$    | $0 \text{ molecules}^{-1}\text{hours}^{-1}$            | Production rate of GF from 3 to 8 hours                                            |
| $\delta_{GF1}$ | $0 \text{ molecules}^{-1}\text{hours}^{-1}$            | Degradation rate of GF from 0 to 2.5 hours                                         |
| $\delta_{GF2}$ | $0.5 \text{ molecules}^{-1}\text{hours}^{-1}$          | Degradation rate of GF from 2.5 to 3 hours                                         |
| $\delta_{GF3}$ | $0.05 \text{ molecules}^{-1}\text{hours}^{-1}$         | Degradation rate of GF from 3 to 8 hours                                           |
| $\mu_o$        | $0.5 \text{ molecules}^{-1}\text{hours}^{-1}$          | Production rate of Spo0A                                                           |
| $\delta_o$     | $0.2 \text{ molecules}^{-1}\text{hours}^{-1}$          | Degradation rate of Spo0A                                                          |
| $k_1$          | $5000 \text{ molecules}^{-1}\text{hours}^{-1}$         | Binding rate of Spo0A to activating site                                           |
| $k_2$          | $1000 \text{ molecules}^{-1}\text{hours}^{-1}$         | First dissociation rate of Spo0A from activating site                              |
| $k_3$          | $100 \text{ molecules}^{-1}\text{hours}^{-1}$          | Second dissociation rate of Spo0A from activating site                             |
| $k_4$          | $10 \text{ molecules}^{-1}\text{hours}^{-1}$           | Third dissociation rate of Spo0A from activating site                              |
| $k_5$          | $2500 \text{ molecules}^{-1}\text{hours}^{-1}$         | Binding rate of Spo0A to repressive site (R1/R2)                                   |
| $k_6$          | $2.5\text{E}6 \text{ molecules}^{-1}\text{hours}^{-1}$ | First dissociation rate of Spo0A from repressive site                              |
| $k_7$          | $2500 \text{ molecules}^{-1}\text{hours}^{-1}$         | Second dissociation rate of Spo0A from repressive site                             |
| $k_8$          | $1000 \text{ molecules}^{-1}\text{hours}^{-1}$         | Binding rate of Rok to first repressive site (A123)                                |
| $k_9$          | $10000 \text{ molecules}^{-1}\text{hours}^{-1}$        | Dissociation rate of Rok from first repressive site (A123)                         |
| $k_{10}$       | $1000 \text{ molecules}^{-1}\text{hours}^{-1}$         | Binding rate of Rok to second repressive site                                      |
| $k_{11}$       | $1\text{E}5 \text{ molecules}^{-1}\text{hours}^{-1}$   | Dissociation rate of Rok from second repressive site when Spo0A not bound at R1/R2 |
| $k_{12}$       | $100 \text{ molecules}^{-1}\text{hours}^{-1}$          | Dissociation rate of Rok from second repressive site when Spo0A bound at R1/R2     |
| $\mu_1$        | $1 \text{ molecules}^{-1}\text{hours}^{-1}$            | Transcription rate of promoter without Spo0A or Rok                                |
| $\mu_2$        | $2 \text{ molecules}^{-1}\text{hours}^{-1}$            | Transcription rate of activated promoter                                           |
| $\mu_3$        | $2\text{E}-3 \text{ molecules}^{-1}\text{hours}^{-1}$  | Transcription rate of repressed promoter                                           |
| $\delta_M$     | $3 \text{ molecules}^{-1}\text{hours}^{-1}$            | Degradation rate of <i>comK</i> transcript                                         |
